# Supplementary material for: An overlooked subset of Cx3cr1wt/wt microglia in the Cx3cr1CreER-Eyfp/wt mouse has a repopulation advantage over Cx3cr1CreER-Eyfp/wt microglia following microglial depletion
Source: PubMed Central journal article supplement (PMC8783445; doi:10.1186/s12974-022-02381-6), 2022-01-21

Fig. S1

a

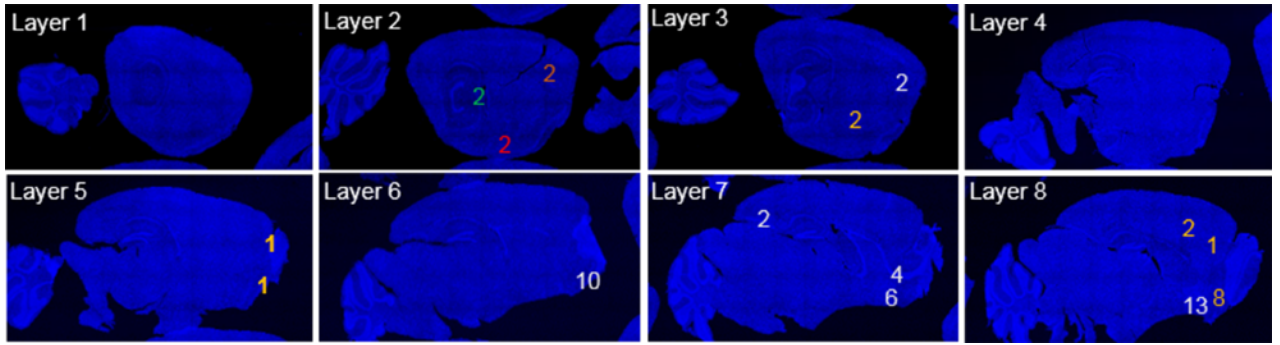

Fig. S2

a

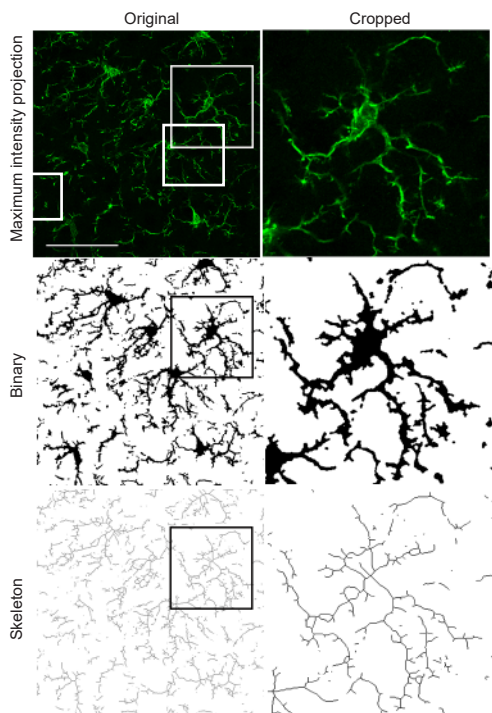

b

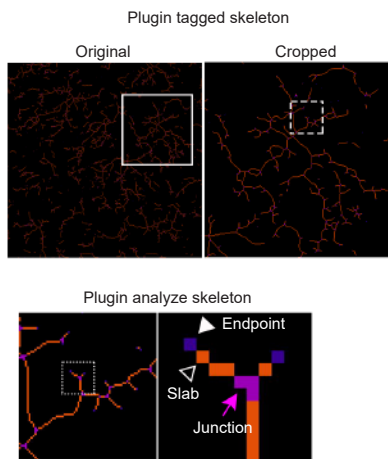

c

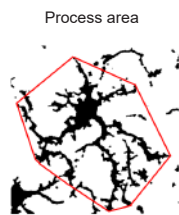

Fig. S3

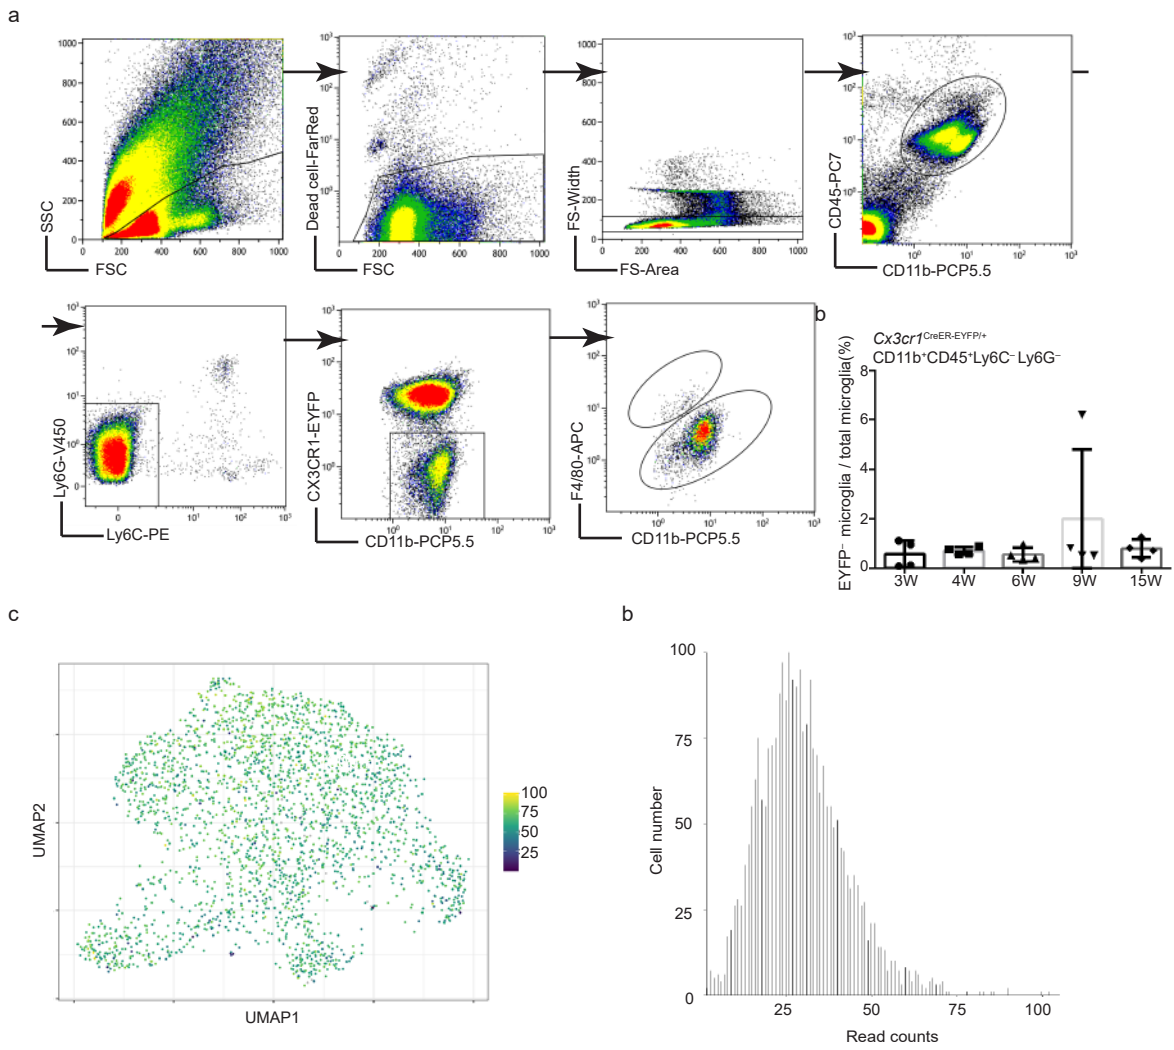

Fig. S4

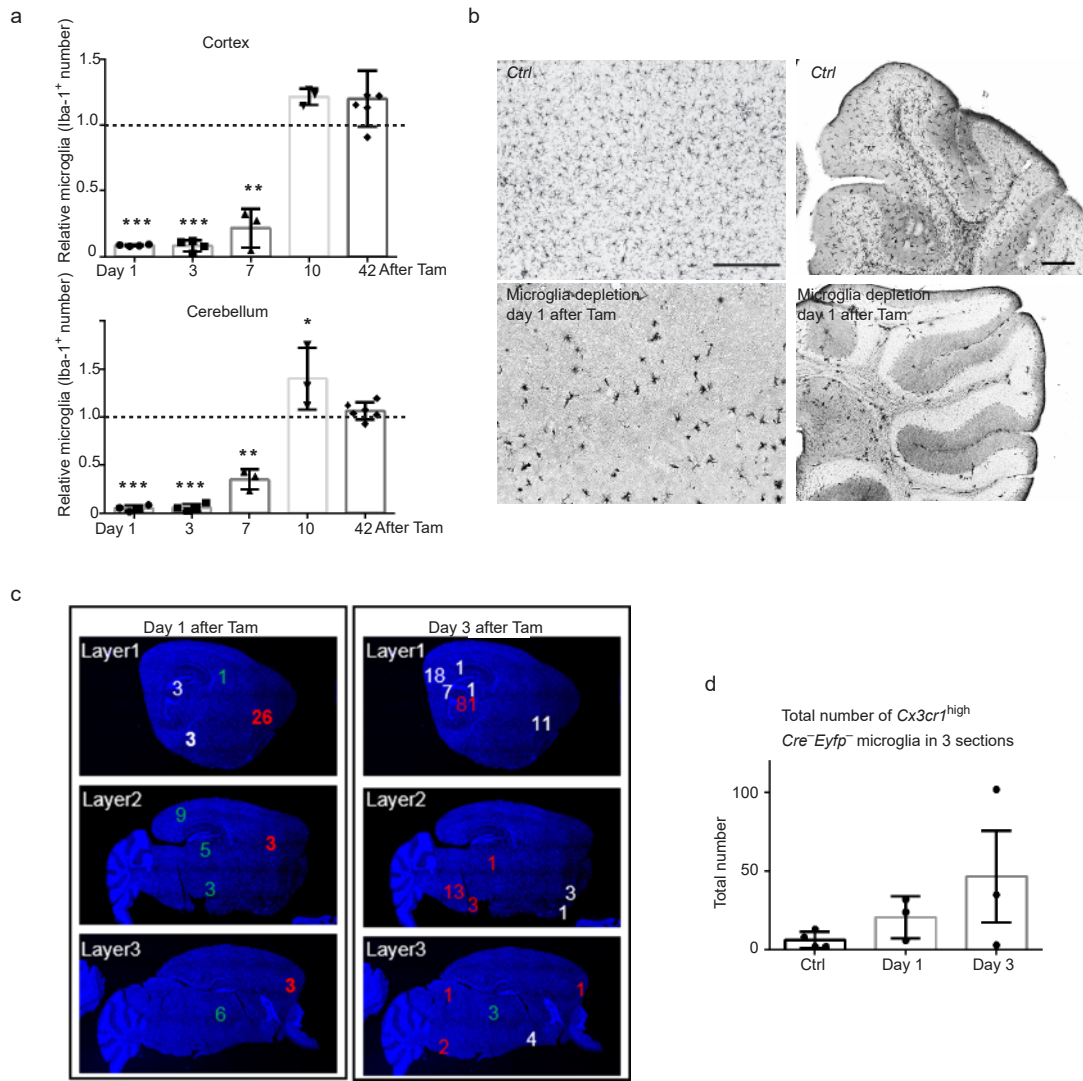

Fig. S5

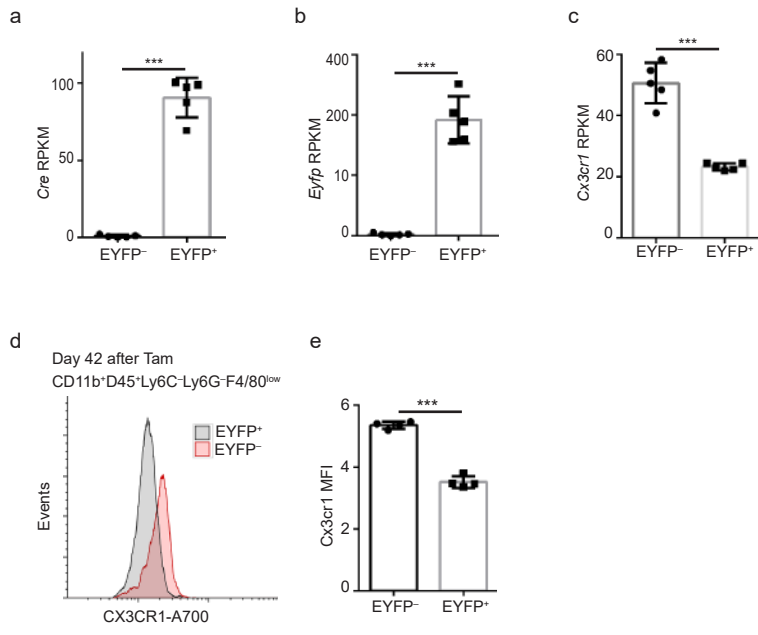



Fig. S6

a

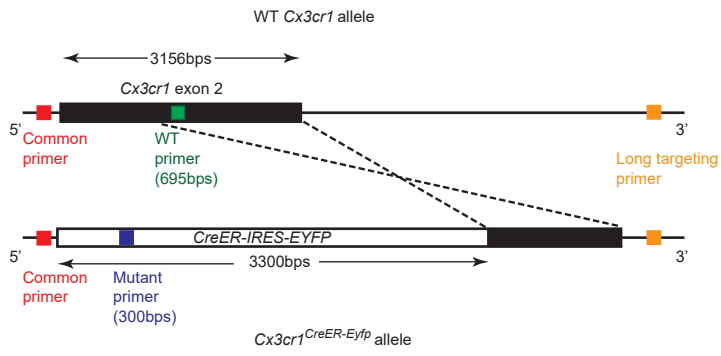

b

*Cx3cr1*: Chromosome 9, 119,901,616 - 120,068,283  
 Protein coding exon 2: 120049265 - 120052345, 3156bps

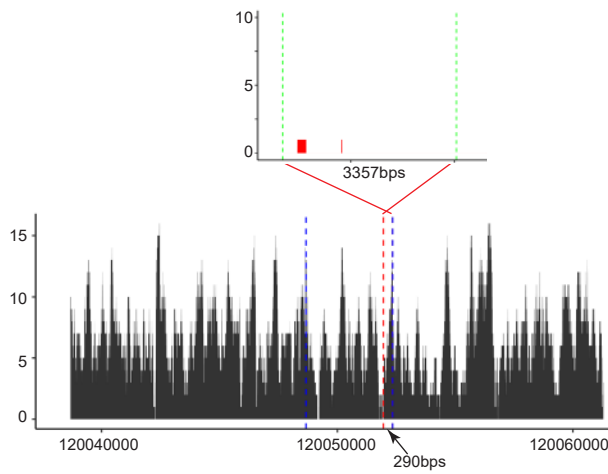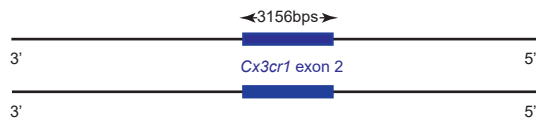

*Cx3cr1*<sup>wt/wt</sup>Cre<sup>-</sup>Eyfp<sup>-</sup> microglia

c

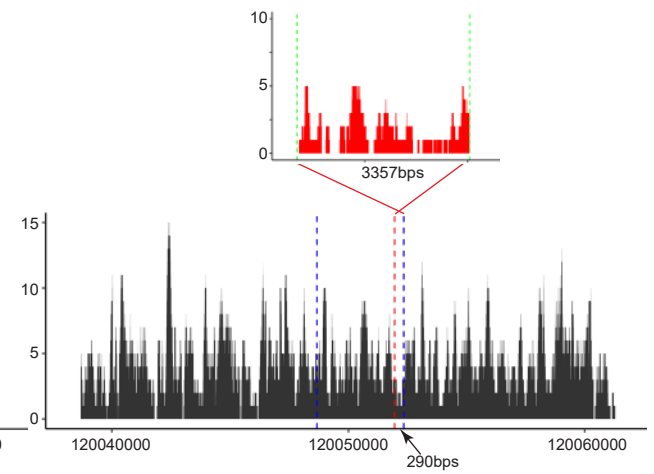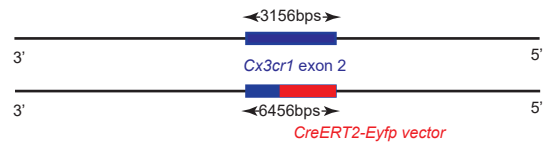

*Cx3cr1*<sup>CreER-EYFP/wt</sup>Cre<sup>+</sup>Eyfp<sup>+</sup> microglia

d

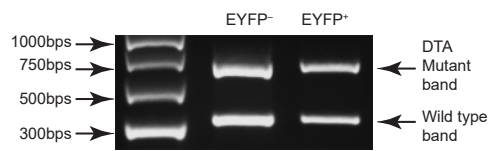

e

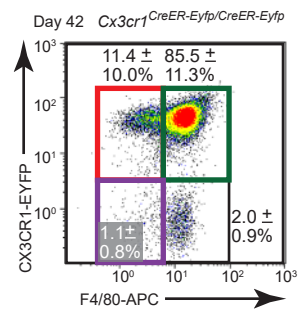

Supplement: 12974_2022_2381_MOESM1_ESM.pdf [file 12974_2022_2381_MOESM1_ESM.pdf]
